# Supplementary material
Source: publisher figshare collection journal article supplement (https://tandf.figshare.com/articles/dataset/_/4046574)
Supplement: Supplementary file 1 [file 2]

**Supplementary Material**

**Table S1** List of tandemly organized highly repetitive DNA sequences transcribed in amphibians and birds.

The table represents list of the amphibians and avian tandem repeats, which were studied in order to evaluate the transcription of their sequences. All tandem repeats sequences were divided into groups according to their location on chromosomes.

**Figure S1** Subtelomeric tandem PO41 repeat is transcribed in chicken embryonic tissue.

Fragment of chicken embryo at 11HH stage after the whole mount DNA/RNA *in situ* hybridization with PO41neg probe (red). PO41 RNAs localize in the cell nuclei.

Arrows show transcripts foci, arrowheads show dispersed transcripts. Nuclei were counterstained with DAPI. Scale bar: 5 μm.
